# Supplementary material for: Protein Methyltransferase Inhibition Decreases Endocrine Specification Through the Upregulation of Aldh1b1 Expression
Source: PubMed Central journal article supplement — Stem Cells. 2019 Feb 13;37(5):640–51. doi: 10.1002/stem.2979 (PMC6850398; doi:10.1002/stem.2979), 2019-02-13
Supplement: STEM-37-640-s001.pdf [file STEM-37-640-s001.pdf]

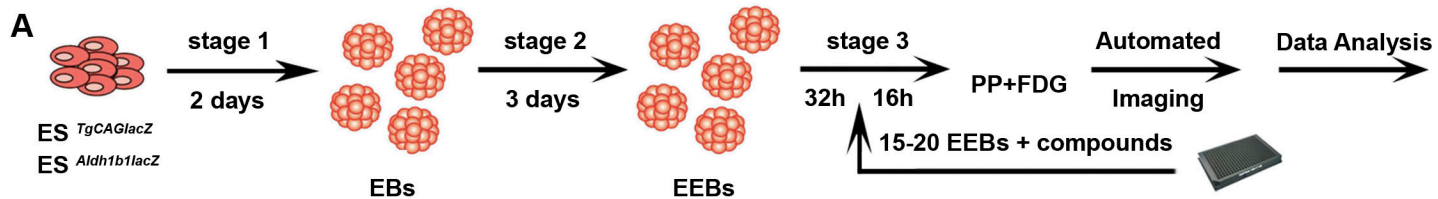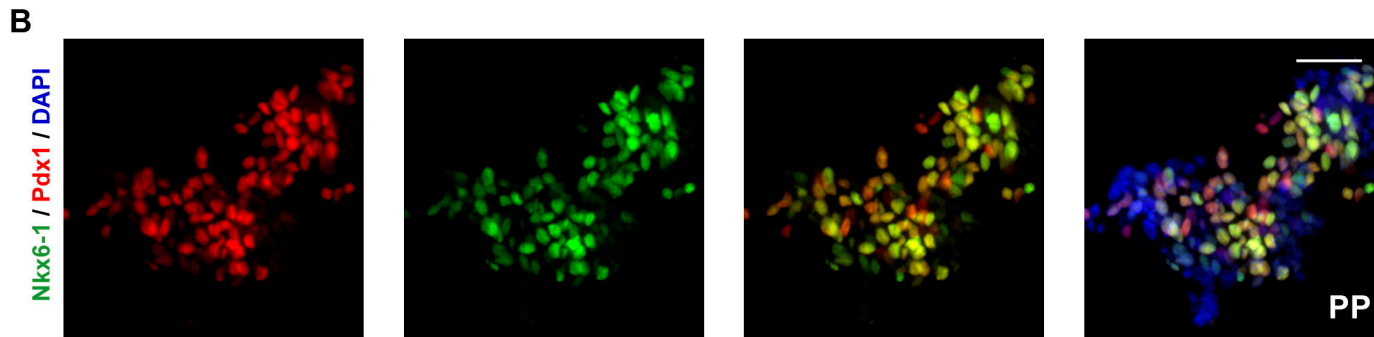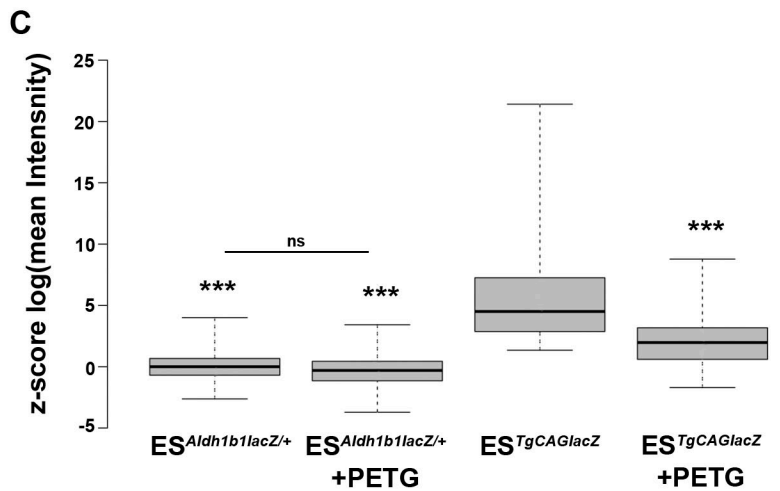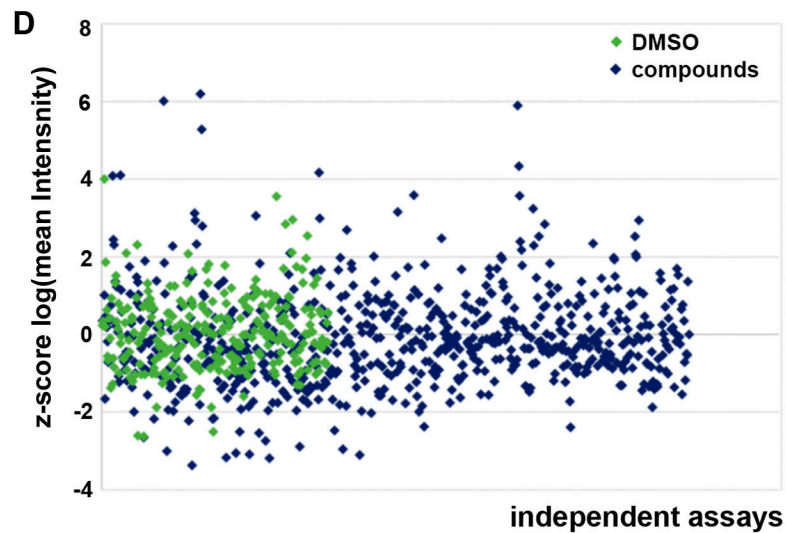

**Figure S1**

ES<sup>Aldh1b1tm1lacZ/+</sup> derived PP clusters

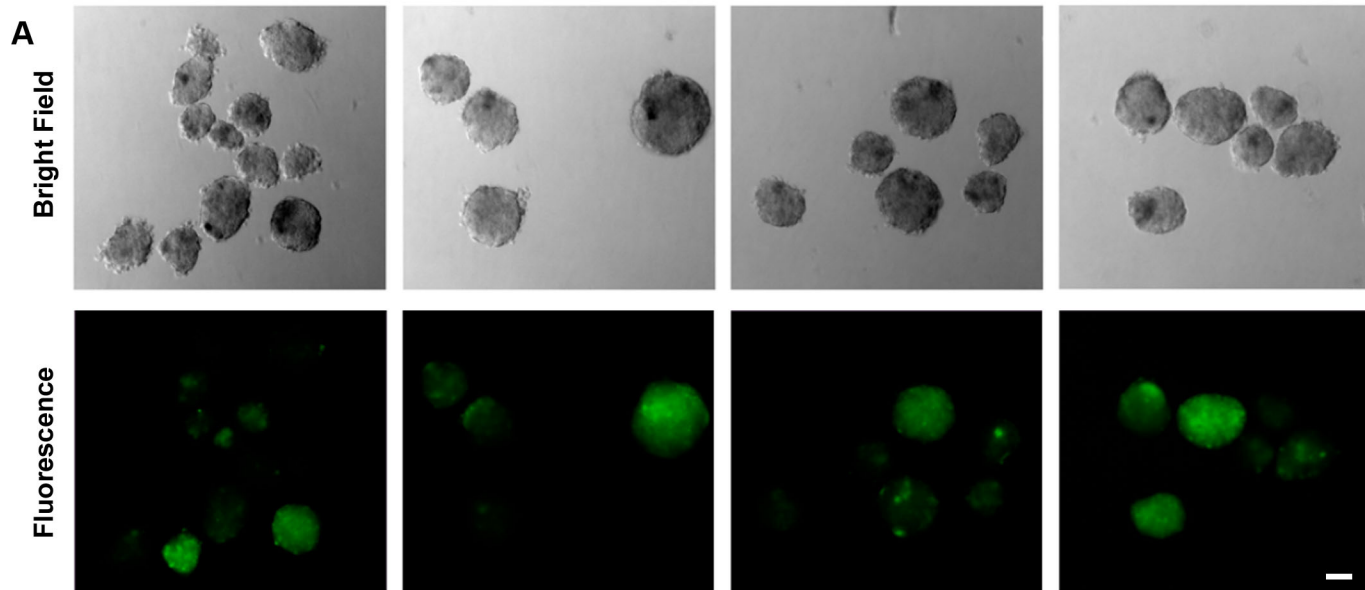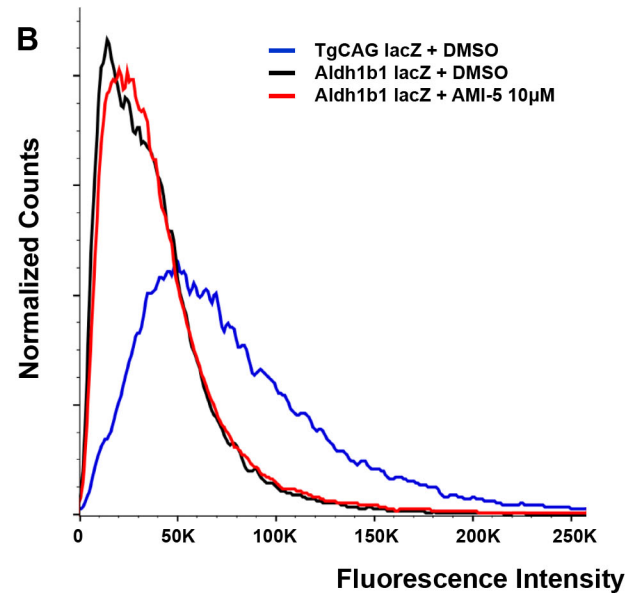

Figure S2

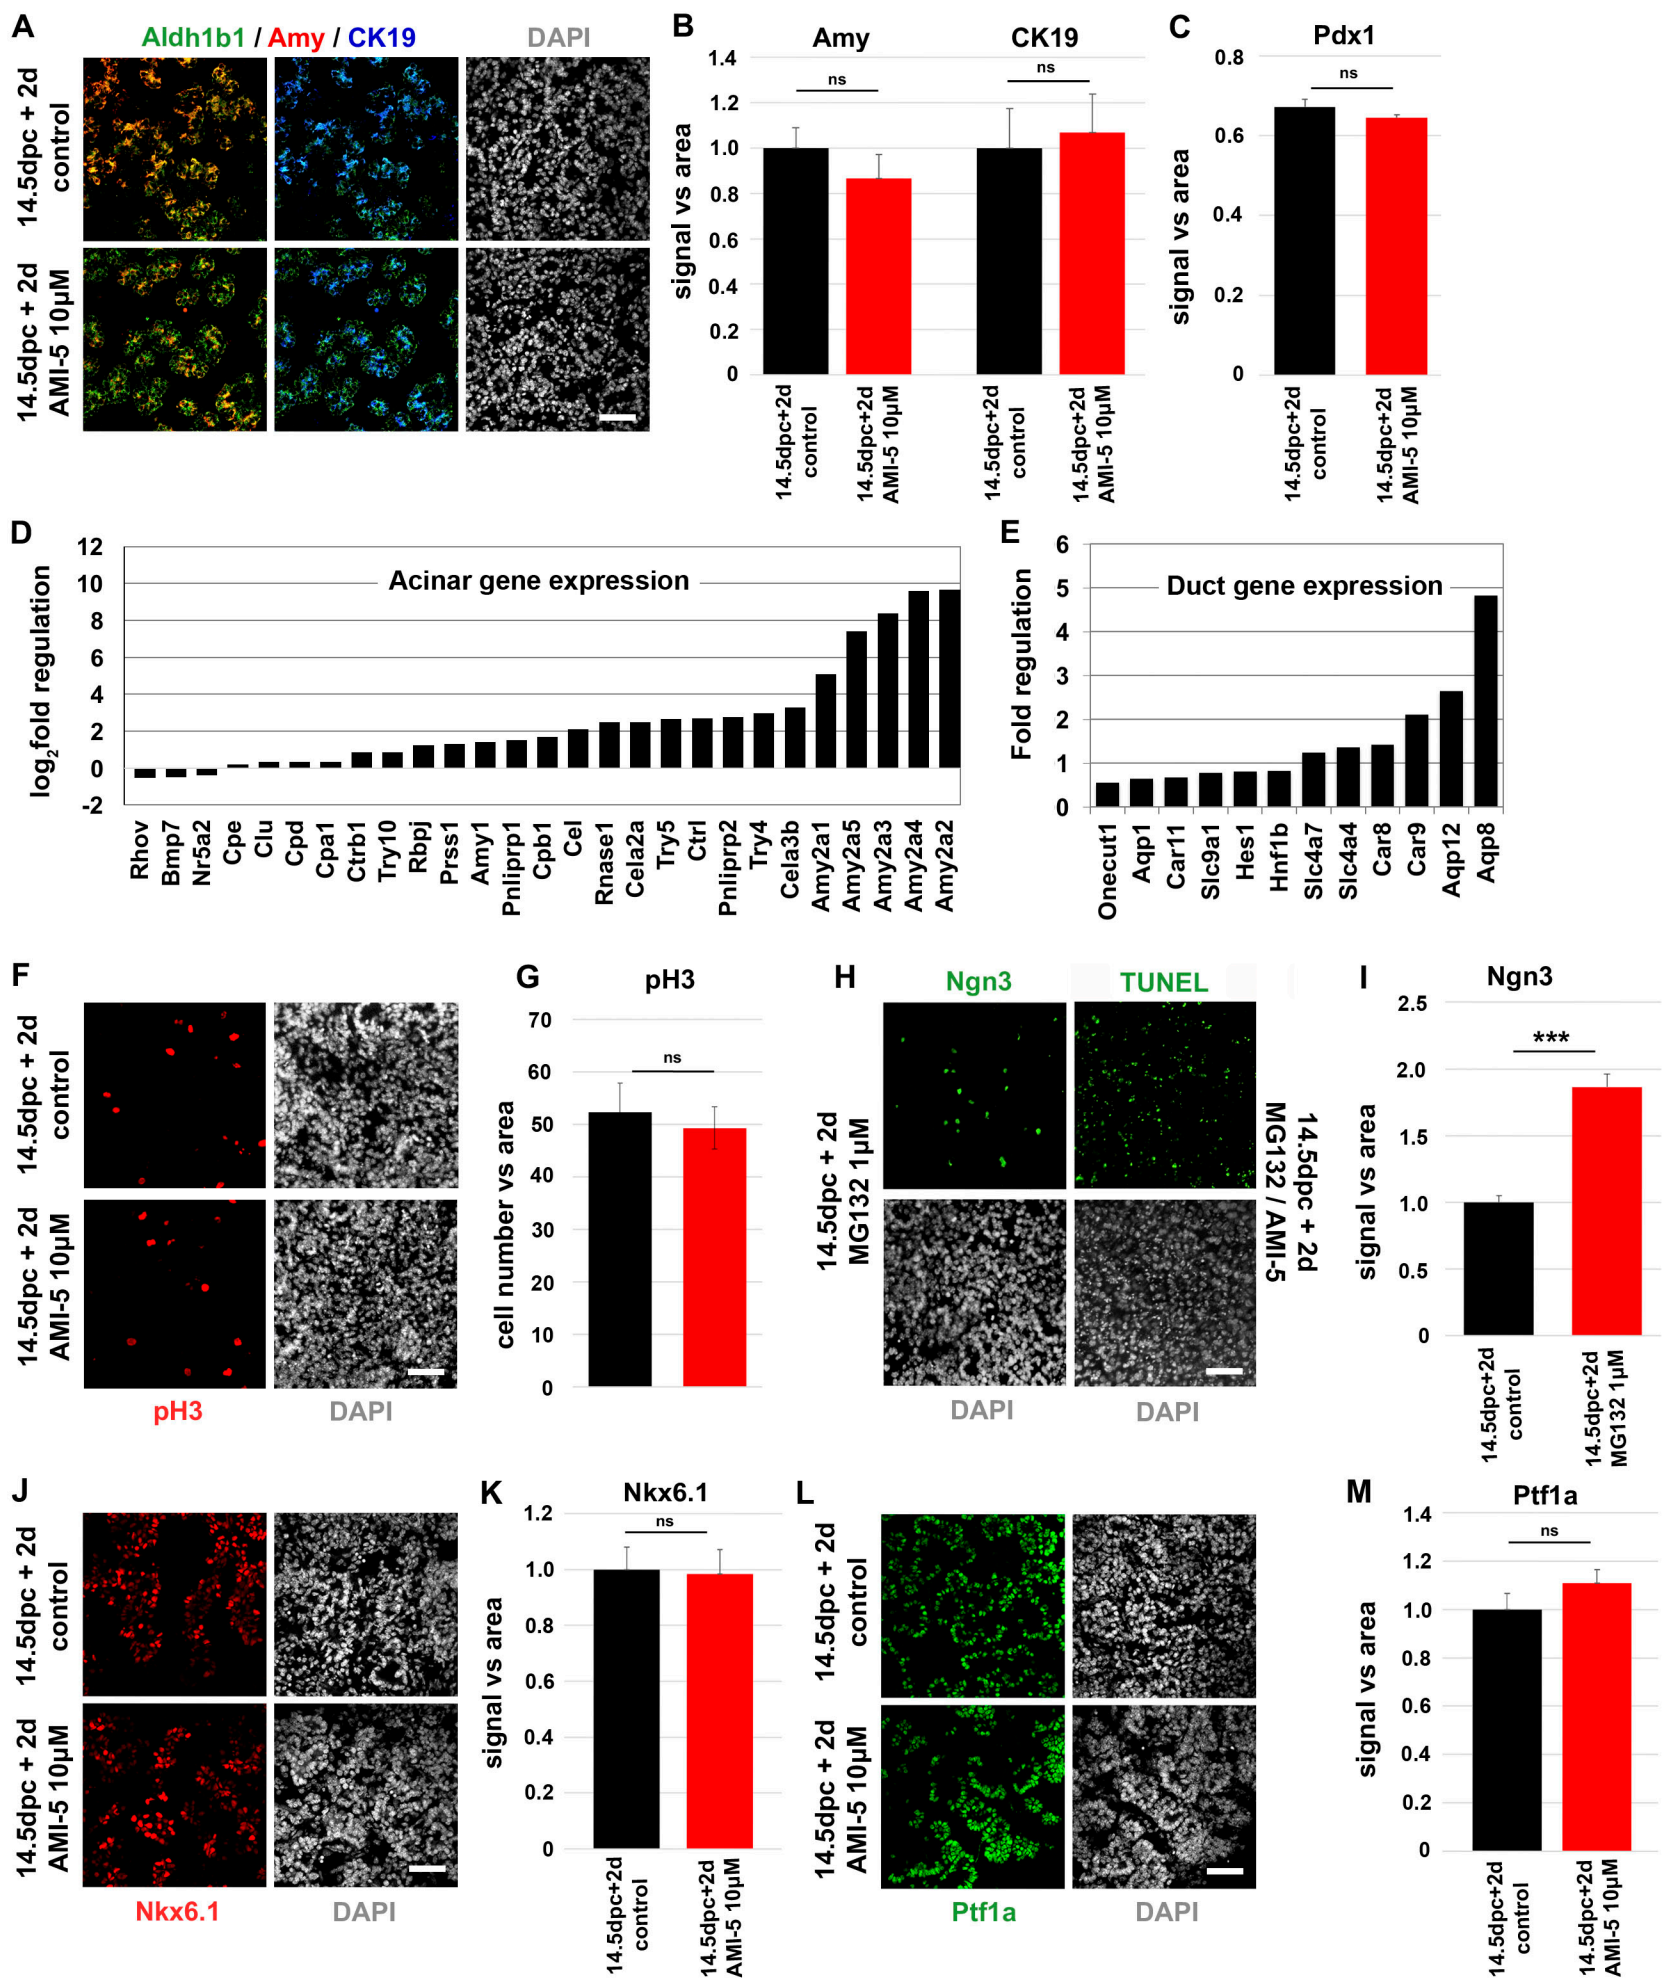

Figure S3

**Figure S1. A screen using mES cell derived pancreas progenitors to identify small molecules that induce *Aldh1b1* expression.** (A) Schematic diagram of the screening protocol for the ES<sup>*Aldh1b1lacZ*</sup> and ES<sup>*TgCAGlacZ*</sup> cell lines. (B) Immunofluorescence analysis of PP clusters showed that Pdx1<sup>+</sup> cells comprise the large majority of PP cells while the numerous Nkx6.1<sup>+</sup> cells are a subset of the former. (C) To confirm the specificity of the screening assay, the  $\beta$ -gal inhibitor PETG was added during the screen. The activity of the ES<sup>*TgCAGlacZ*</sup> decreased to background levels whereas the activity of the ES<sup>*Aldh1b1lacZ*</sup> remained always negligible (ES<sup>*Aldh1b1lacZ*</sup> n=268, ES<sup>*Aldh1b1lacZ*</sup>+PETG n=86, ES<sup>*TgCAGlacZ*</sup> n=86, ES<sup>*TgCAGlacZ*</sup>+PETG n=86), samples were compared to the ES<sup>*TgCAGlacZ*</sup> sample. (D) Plot of the z-score of the log(mean fluorescence intensity) for each of the assays using compounds of the StemSelect™ Small Molecule Regulators Library (blue) or DMSO controls (green). Abbreviations: FDG, fluorescein-di-beta-D-galactopyranoside. Scale bar: 25  $\mu$ m. \*\*\* p < 0.001.

**Figure S2. Heterogeneity of AMI-5 induced *Aldh1b1* expression in mouse ES cell derived pancreatic progenitors.** (A) Cellular heterogeneity of ES<sup>*Aldh1b1lacZ*</sup> derived PP clusters as revealed by the fluorescence  $\beta$ -galactosidase assay. (B) Fluorescence intensity distribution of PP clusters generated from the ES<sup>*Aldh1b1lacZ*</sup> and ES<sup>*TgCAGlacZ*</sup> lines after treatment for 16 h with DMSO or 10 $\mu$ M AMI-5 respectively. The Y-axis represents events normalized for the area under each curve (percentage of cells found at a given bin) (n=3). scale bar: 50 $\mu$ m.

**Figure S3. AMI-5 does not affect specification of the acinar or duct lineages.** (A) Immunofluorescence analysis of 14.5dpc pancreata after 2 days in ALI cultures shows no difference in the expression of amylase and CK19 in pancreata treated with 10  $\mu$ M AMI-5. (B) Relative quantitation of the Amylase and CK19 fluorescence signal in 14.5dpc pancreata cultured in ALI for 2 days in the absence or presence of 10  $\mu$ M AMI-5 (n=4). (C) Quantitation of Pdx1<sup>+</sup> cells following immunofluorescence in 14.5dpc pancreata after 2 days in ALI in the absence or presence of 10  $\mu$ M AMI-5. (D, E) Fold regulation of acinar (D) and duct (E) markers at 14.5 + 2 days in ALI culture in the presence of 10  $\mu$ M AMI-5 in relation to untreated controls. Only significantly regulated genes are shown (*p*adj $\leq$ 0.05). (F, G) Quantitation of cells in mitosis using pH3 immunofluorescence showed that mitosis rates did not change upon AMI-5 treatment (n=3). (H) Immunofluorescence analysis of Ngn3 expression in 14.5dpc pancreata after 2 days in ALI cultures in pancreata treated with 1  $\mu$ M MG132 and TUNEL analysis following exposure to a combination of 10  $\mu$ M AMI-5 and 1  $\mu$ M MG132 for two days. (I) Relative quantitation of the number of Ngn3<sup>+</sup> cells in 14.5dpc pancreata cultured in ALI for 2

days in the presence of 1  $\mu$ M MG132 (n=3). **(J)** Immunofluorescence analysis of 14.5dpc pancreata after 2 days in ALI cultures shows no effect in the expression of the bipotent progenitor marker Nkx6.1 in pancreata treated with 10  $\mu$ M AMI-5. **(K)** Relative quantitation of the Nkx6.1 fluorescence signal in 14.5dpc pancreata cultured in ALI for 2 days in the absence or presence of 10  $\mu$ M AMI-5 (n=4). **(L)** Immunofluorescence analysis of 14.5dpc pancreata after 2 days in ALI cultures shows no effect in the expression of the acinar progenitor marker Ptf1a in pancreata treated with 10  $\mu$ M AMI-5. **(M)** Relative quantitation of the Ptf1a fluorescence signal in 14.5dpc pancreata cultured in ALI for 2 days in the absence or presence of 10  $\mu$ M AMI-5 (n=4). Error bars show SEM; ns, not significant. Scale bar: 50 $\mu$ m.

Table S1 Expression of lineage specific genes in 14.5dpc + 2 pancreatic explants

| Ensembl ID                    | Gene Symbol | Fold Regulation<br>(+AMI-5 / CONTROL) | padj<br>(+AMI-5 / CONTROL) | CONTROL<br>14.5 dpc + 2 | AMI-5<br>14.5 dpc + 2 | FULL GENE NAME                                                              |
|-------------------------------|-------------|---------------------------------------|----------------------------|-------------------------|-----------------------|-----------------------------------------------------------------------------|
| <b>ENDOCRINE CELL MARKERS</b> |             |                                       |                            |                         |                       |                                                                             |
| ENSMUSG00000047591            | Mafa        | 0,384                                 | 1,26178E-22                | 418,3                   | 157                   | v-maf musculoaponeurotic fibrosarcoma oncogene family, protein A            |
| ENSMUSG00000029706            | Pax4        | 0,390                                 | 2,66349E-07                | 100,6                   | 36,3                  | paired box 4                                                                |
| ENSMUSG00000035277            | Arx         | 0,406                                 | 2,00763E-12                | 255,7                   | 100,4                 | aristaless related homeobox                                                 |
| ENSMUSG00000055197            | Fev         | 0,483                                 | 9,60573E-10                | 278,5                   | 131                   | FEV (ETS oncogene family)                                                   |
| ENSMUSG00000001517            | Foxm1       | 0,507                                 | 8,51374E-24                | 1057,9                  | 531,2                 | forkhead box M1                                                             |
| ENSMUSG000000034771           | Tle2        | 0,518                                 | 3,60418E-18                | 1676                    | 862,4                 | transducin-like enhancer of split 2                                         |
| ENSMUSG00000001566            | Mnx1        | 0,532                                 | 5,10738E-07                | 225,1                   | 117,9                 | motor neuron and pancreas homeobox 1                                        |
| ENSMUSG000000035187           | Nkx6-1      | 0,559                                 | 1,31108E-21                | 2459,1                  | 1368,4                | NK6 homeobox 1                                                              |
| ENSMUSG00000004099            | Dnmt1       | 0,570                                 | 8,98186E-25                | 3936,5                  | 2239,1                | DNA methyltransferase (cytosine-5) 1                                        |
| ENSMUSG000000068154           | Insm1       | 0,607                                 | 1,69432E-12                | 990,5                   | 596,3                 | insulinoma-associated 1                                                     |
| ENSMUSG00000032280            | Tle3        | 0,633                                 | 3,49833E-20                | 2736,5                  | 1725,2                | transducin-like enhancer of split 3                                         |
| ENSMUSG000000064177           | Ghrl        | 0,642                                 | 2,75095E-09                | 1371,1                  | 872,4                 | ghrelin                                                                     |
| ENSMUSG00000029644            | Pdx1        | 0,646                                 | 1,06343E-11                | 1549,7                  | 1000                  | pancreatic and duodenal homeobox 1                                          |
| ENSMUSG00000029556            | Hnf1a       | 0,664                                 | 8,67669E-07                | 507,7                   | 335,9                 | HNF1 homeobox A                                                             |
| ENSMUSG000000041798           | Gck         | 0,669                                 | 3,25688E-09                | 892,4                   | 596,6                 | glucokinase                                                                 |
| ENSMUSG00000038894            | Irs2        | 0,678                                 | 3,38945E-07                | 897,9                   | 608,2                 | insulin receptor substrate 2                                                |
| ENSMUSG00000028800            | Hdac1       | 0,683                                 | 2,90604E-05                | 415,8                   | 282,4                 | histone deacetylase 1                                                       |
| ENSMUSG00000025880            | Smad7       | 0,717                                 | 0,000452304                | 587,2                   | 419,6                 | SMAD family member 7                                                        |
| ENSMUSG00000020661            | Dnmt3a      | 0,722                                 | 8,76991E-10                | 6319,3                  | 4565,3                | DNA methyltransferase 3A                                                    |
| ENSMUSG00000001504            | Irx2        | 0,732                                 | 0,02407326                 | 232,5                   | 168,7                 | Iroquois related homeobox 2                                                 |
| ENSMUSG00000027350            | Chgb        | 0,742                                 | 4,70042E-05                | 7563,9                  | 5592,9                | chromogranin B                                                              |
| ENSMUSG00000000184            | Cend2       | 0,768                                 | 1,20113E-09                | 7758,9                  | 5948,5                | cyclin D2                                                                   |
| ENSMUSG000000006728           | Cdk4        | 0,785                                 | 3,27135E-06                | 8249,3                  | 6446,1                | cyclin-dependent kinase 4                                                   |
| ENSMUSG00000070348            | Cend1       | 0,785                                 | 8,17319E-05                | 1812,5                  | 1420,2                | cyclin D1                                                                   |
| ENSMUSG00000022346            | Myc         | 0,796                                 | 0,001341315                | 1768,4                  | 1404,6                | myelocytomatosis oncogene                                                   |
| ENSMUSG00000027715            | Cena2       | 0,812                                 | 0,000959199                | 1489,4                  | 1209,5                | cyclin A2                                                                   |
| ENSMUSG00000037025            | Foxa2       | 0,824                                 | 0,005218337                | 1294,9                  | 1060,8                | forkhead box A2                                                             |
| ENSMUSG00000027434            | Nkx2-2      | 0,835                                 | 0,01122961                 | 1165,7                  | 972,1                 | NK2 homeobox 2                                                              |
| ENSMUSG00000017950            | Hnf4a       | 0,835                                 | 0,02103923                 | 1116,5                  | 929,9                 | hepatic nuclear factor 4, alpha                                             |
| ENSMUSG00000033016            | Nfatc1      | 0,841                                 | 0,0326822                  | 760,4                   | 637,1                 | nuclear factor of activated T cells, cytoplasmic, calcineurin dependent 1   |
| ENSMUSG00000027690            | Slc2a2      | 1,197                                 | 0,006792527                | 1718,7                  | 2058                  | solute carrier family 2 (facilitated glucose transporter), member 2         |
| ENSMUSG00000022315            | Slc30a8     | 1,310                                 | 0,001213559                | 592,3                   | 780,2                 | solute carrier family 30 (zinc transporter), member 8                       |
| ENSMUSG00000027801            | Tm4sf4      | 1,347                                 | 2,47186E-05                | 1877                    | 2533,8                | transmembrane 4 superfamily member 4                                        |
| ENSMUSG00000035804            | Ins1        | 1,424                                 | 2,05098E-07                | 20812                   | 29682,6               | insulin I                                                                   |
| ENSMUSG00000017007            | Rbpjl       | 0,712                                 | 0,09463305                 | 5451                    | 3798,5                | recombination signal binding protein for immunoglobulin kappa J region-like |
| ENSMUSG00000060969            | Irx1        | 0,790                                 | 0,1069848                  | 176,9                   | 139,1                 | Iroquois related homeobox 1                                                 |
| ENSMUSG00000012520            | Phox2b      | 0,877                                 | 0,3971957                  | 115,8                   | 101                   | paired-like homeobox 2b                                                     |
| ENSMUSG00000021194            | Chga        | 0,889                                 | 0,05045055                 | 3418,7                  | 3029,1                | chromogranin A                                                              |
| ENSMUSG00000052942            | Glis3       | 0,914                                 | 0,3770357                  | 977,5                   | 893,7                 | GLIS family zinc finger 3                                                   |
| ENSMUSG00000026204            | Ptpn        | 0,927                                 | 0,5513814                  | 1315,5                  | 1221,1                | protein tyrosine phosphatase, receptor type, N                              |
| ENSMUSG00000074622            | Mafb        | 0,946                                 | 0,4163351                  | 1877,5                  | 1781,2                | v-maf musculoaponeurotic fibrosarcoma oncogene family, protein B            |
| ENSMUSG00000010505            | Myt1        | 0,946                                 | 0,5190577                  | 635,3                   | 601                   | myelin transcription factor 1                                               |
| ENSMUSG00000019900            | Rfx6        | 0,966                                 | 0,660487                   | 390,9                   | 378,3                 | regulatory factor X, 6                                                      |
| ENSMUSG00000000215            | Ins2        | 0,979                                 | 1                          | 33058,2                 | 32289,7               | insulin II                                                                  |
| ENSMUSG00000042258            | Isl1        | 1,000                                 | 0,8966366                  | 794,3                   | 794,6                 | ISL1 transcription factor, LIM/homeodomain                                  |
| ENSMUSG00000034701            | Neurod1     | 1,014                                 | 0,806127                   | 734,2                   | 744,6                 | neurogenic differentiation 1                                                |
| ENSMUSG00000021587            | Peskl       | 1,035                                 | 0,6144358                  | 1363,1                  | 1413,3                | proprotein convertase subtilisin/kexin type 1                               |
| ENSMUSG00000027168            | Pax6        | 1,035                                 | 0,8305871                  | 960,4                   | 995,7                 | paired box 6                                                                |
| ENSMUSG00000027419            | Pesk2       | 1,050                                 | 0,7591615                  | 5764,9                  | 6059,1                | proprotein convertase subtilisin/kexin type 2                               |
| ENSMUSG00000017316            | Ppy         | 1,057                                 | 0,4488349                  | 440                     | 465,8                 | pancreatic polypeptide                                                      |
| ENSMUSG00000004366            | Sst         | 1,087                                 | 0,2832594                  | 3709,8                  | 4027,9                | somatostatin                                                                |
| ENSMUSG00000031393            | Mecp2       | 1,110                                 | 0,2442072                  | 1023,7                  | 1137                  | methyl CpG binding protein 2                                                |
| ENSMUSG000000041681           | Iapp        | 1,149                                 | 0,1215843                  | 12634                   | 14500,6               | islet amyloid polypeptide                                                   |
| ENSMUSG00000000394            | Gcg         | 1,338                                 | 0,1826873                  | 13333,7                 | 18115,2               | glucagon                                                                    |

ACINAR CELL MARKERS

|                    |          |         |             |          |           |                                                                             |
|--------------------|----------|---------|-------------|----------|-----------|-----------------------------------------------------------------------------|
| ENSMUSG00000096569 | Amy2a2   | 809,002 | 0           | 13,4     | 20614,1   | amylase 2a2                                                                 |
| ENSMUSG00000096770 | Amy2a4   | 770,686 | 6,0561E-275 | 4,8      | 9235,9    | amylase 2a4                                                                 |
| ENSMUSG00000093931 | Amy2a3   | 333,144 | 1,1025E-234 | 7,2      | 4567      | amylase 2a3                                                                 |
| ENSMUSG00000074268 | Amy2a5   | 171,255 | 0           | 29,7     | 6234,4    | amylase 2a5                                                                 |
| ENSMUSG00000070360 | Amy2a1   | 34,297  | 2,33893E-86 | 11,7     | 557,3     | amylase 2a1                                                                 |
| ENSMUSG00000023433 | Cela3b   | 9,714   | 3,83286E-23 | 2312,5   | 31315,8   | chymotrypsin-like elastase family, member 3B                                |
| ENSMUSG00000054106 | Try4     | 7,781   | 9,49112E-29 | 682,2    | 6341,7    | trypsin 4                                                                   |
| ENSMUSG00000025091 | Plniprp2 | 6,774   | 7,19519E-33 | 266,1    | 2034,2    | pancreatic lipase-related protein 2                                         |
| ENSMUSG00000031896 | Ctrl     | 6,498   | 2,13088E-08 | 139,2    | 2330,8    | chymotrypsin-like                                                           |
| ENSMUSG00000036938 | Try5     | 6,364   | 4,255E-160  | 12906,4  | 84069,5   | trypsin 5                                                                   |
| ENSMUSG00000058579 | Cela2a   | 5,657   | 9,87845E-16 | 12035,9  | 83825,3   | chymotrypsin-like elastase family, member 2A                                |
| ENSMUSG00000035896 | Rnase1   | 5,618   | 1,50524E-16 | 2427,7   | 16497,6   | ribonuclease, RNase A family, 1                                             |
| ENSMUSG00000026818 | Cel      | 4,287   | 5,02758E-26 | 32007,9  | 146406,5  | carboxyl ester lipase                                                       |
| ENSMUSG00000011463 | Cpb1     | 3,182   | 3,26583E-05 | 4651,9   | 18657,5   | carboxypeptidase B1                                                         |
| ENSMUSG00000042179 | Plniprp1 | 2,848   | 2,7938E-12  | 280429   | 838879,4  | pancreatic lipase related protein 1                                         |
| ENSMUSG00000074264 | Amy1     | 2,657   | 1,49864E-19 | 157,2    | 428,2     | amylase 1, salivary                                                         |
| ENSMUSG00000062751 | Prss1    | 2,445   | 0,000907372 | 8425,2   | 23879,5   | protease, serine 1 (trypsin 1)                                              |
| ENSMUSG00000039191 | Rbpj     | 2,378   | 2,38702E-19 | 180,1    | 436,1     | recombination signal binding protein for immunoglobulin kappa J region      |
| ENSMUSG00000031957 | Ctrb1    | 1,828   | 2,77518E-06 | 655091,7 | 1217226,5 | chymotrypsinogen B1                                                         |
| ENSMUSG00000071521 | Try10    | 1,828   | 0,001322013 | 6590,3   | 12530,9   | trypsin 10                                                                  |
| ENSMUSG00000054446 | Cpa1     | 1,275   | 0,002694321 | 112256,5 | 143171,5  | carboxypeptidase A1, pancreatic                                             |
| ENSMUSG00000020841 | Cpd      | 1,257   | 0,001719374 | 1990,4   | 2513,4    | carboxypeptidase D                                                          |
| ENSMUSG00000022037 | Clu      | 1,248   | 0,002382454 | 30231    | 37919     | clusterin                                                                   |
| ENSMUSG00000037852 | Cpe      | 1,149   | 0,03180342  | 7853,7   | 9016      | carboxypeptidase E                                                          |
| ENSMUSG00000026398 | Nr5a2    | 0,768   | 0,000268362 | 1838,4   | 1406,9    | nuclear receptor subfamily 5, group A, member 2                             |
| ENSMUSG00000008999 | Bmp7     | 0,707   | 2,94497E-05 | 1292,4   | 910,1     | bone morphogenetic protein 7                                                |
| ENSMUSG00000034226 | Rhov     | 0,693   | 5,08307E-06 | 1478     | 1016,5    | ras homolog family member V                                                 |
| ENSMUSG00000062478 | Ctrc     | 1,840   | 0,09297903  | 175,8    | 966,2     | chymotrypsin C                                                              |
| ENSMUSG00000023031 | Cela1    | 1,613   | 0,05101512  | 6432,6   | 10941,4   | chymotrypsin-like elastase family, member 1                                 |
| ENSMUSG00000004266 | Ptpn6    | 1,157   | 0,08275645  | 447,8    | 517,6     | protein tyrosine phosphatase, non-receptor type 6                           |
| ENSMUSG00000071553 | Cpa2     | 1,149   | 0,1232148   | 72914    | 83945,7   | carboxypeptidase A2, pancreatic                                             |
| ENSMUSG00000052271 | Bhlha15  | 1,102   | 0,3549535   | 2128,5   | 2348,5    | basic helix-loop-helix family, member a15                                   |
| ENSMUSG00000020787 | P2rx1    | 1,014   | 1           | 1465,3   | 1490,3    | purinergic receptor P2X, ligand-gated ion channel, 1                        |
| ENSMUSG00000026735 | Ptfla    | 0,953   | 0,7577984   | 1282,9   | 1221,9    | pancreas specific transcription factor, 1a                                  |
| ENSMUSG00000017007 | Rbpjl    | 0,712   | 0,09463305  | 5451     | 3798,5    | recombination signal binding protein for immunoglobulin kappa J region-like |

DUCT CELL MARKERS

|                    |         |       |             |        |        |                                                                     |
|--------------------|---------|-------|-------------|--------|--------|---------------------------------------------------------------------|
| ENSMUSG00000030762 | Aqp8    | 4,823 | 6,31203E-10 | 170,8  | 1106   | aquaporin 8                                                         |
| ENSMUSG00000045091 | Aqp12   | 2,639 | 0,000124426 | 142,3  | 436,9  | aquaporin 12                                                        |
| ENSMUSG00000028463 | Car9    | 2,114 | 7,33132E-20 | 554,2  | 1187,7 | carbonic anhydrase 9                                                |
| ENSMUSG00000041261 | Car8    | 1,424 | 0,004028652 | 219,1  | 315    | carbonic anhydrase 8                                                |
| ENSMUSG00000060961 | Slc4a4  | 1,357 | 8,72356E-05 | 496,6  | 676,6  | solute carrier family 4 (anion exchanger)                           |
| ENSMUSG00000021733 | Slc4a7  | 1,240 | 0,007014825 | 612,2  | 759,7  | solute carrier family 4, sodium bicarbonate cotransporter, member 7 |
| ENSMUSG00000020679 | Hnf1b   | 0,829 | 0,006654343 | 1107,1 | 914,3  | HNF1 homeobox B                                                     |
| ENSMUSG00000022528 | Hes1    | 0,812 | 0,001459381 | 1265,5 | 1028,7 | hairy and enhancer of split 1                                       |
| ENSMUSG00000028854 | Slc9a1  | 0,785 | 0,000586766 | 1011,4 | 790,7  | solute carrier family 9 (sodium/hydrogen exchanger)                 |
| ENSMUSG00000003273 | Car11   | 0,674 | 0,03759337  | 136,8  | 89,9   | carbonic anhydrase 11                                               |
| ENSMUSG00000004655 | Aqp1    | 0,651 | 4,85829E-09 | 1287,2 | 836,3  | aquaporin 1                                                         |
| ENSMUSG00000043013 | Onecut1 | 0,559 | 1,35816E-10 | 542,1  | 299    | one cut domain, family member 1                                     |
| ENSMUSG00000024411 | Aqp4    | 1,072 | 0,403821    | 823,4  | 882,2  | aquaporin 4                                                         |
| ENSMUSG00000020911 | Krt19   | 1,028 | 0,9379075   | 2462,5 | 2534,8 | keratin 19                                                          |
| ENSMUSG00000023259 | Slc26a6 | 1,007 | 0,7159408   | 301,4  | 302,8  | solute carrier family 26, member 6                                  |
| ENSMUSG00000027765 | P2ry1   | 0,966 | 1           | 168,3  | 162,3  | purinergic receptor P2Y, G-protein coupled 1                        |
| ENSMUSG00000027562 | Car2    | 0,959 | 1           | 177,6  | 170,1  | carbonic anhydrase 2                                                |
| ENSMUSG00000010175 | Prox1   | 0,927 | 0,2608753   | 1344,2 | 1240,2 | prospero homeobox 1                                                 |
| ENSMUSG00000000567 | Sox9    | 0,914 | 0,19618     | 2976,5 | 2719,3 | SRY (sex determining region Y)-box 9                                |
| ENSMUSG00000052942 | Glis3   | 0,914 | 0,3770357   | 977,5  | 893,7  | GLIS family zinc finger 3                                           |
